# Supplementary material for: Family planning knowledge, attitudes and practices in refugee and migrant pregnant and post-partum women on the Thailand-Myanmar border – a mixed methods study
Source: Springer Nature journal article supplement (doi:10.1186/s12978-016-0212-2), 2016-08-19
Supplement: MOESM3 [file 10600938]

**Supplementary Table. Contraceptive uptake in Maela Camp 2013 to 2015.**

| Type contraceptive                   | User type                     | 2013          | 2014        | 2015         |
|--------------------------------------|-------------------------------|---------------|-------------|--------------|
| Injectable                           | New n, (% of total new users) | 902, (35.2%)  | 676 (41.8%) | 663 (39.9%)  |
|                                      | Continuing                    | 2,305         | 1,664       | 1584         |
| Pill                                 | New n, (% of total new users) | 1,118 (43.6%) | 547 (33.9%) | 513 (30.9%)  |
|                                      | Continuing                    | 2,650         | 1,643       | 1064         |
| Male-<br>Condom                      | New n, (% of total new users) | 338, (13.2%)  | 218, (1.3%) | 123, (7.4%)  |
|                                      | Continuing                    | 494           | 291         | 145          |
| Female-<br>Condom                    | New n, (% of total new users) | -             | -           | 0            |
|                                      | Continuing                    | -             | -           | 0            |
| IUD <sup>1</sup>                     | New n, (% of total new users) | 70, (2.7%)    | 86, (5.3%)  | 267, (16.1%) |
|                                      | Continuing                    | 11            | 1           | 0            |
| Implant                              | New n, (% of total new users) | 38 (1.5%)     | 27 (1.7%)   | 6 (0.4%)     |
|                                      | Continuing                    | 19            | -           | 0            |
| Female<br>Sterilization <sup>1</sup> | New n, (% of total new users) | 95 (3.7%)     | 61 (3.8%)   | 90 (5.4%)    |
|                                      | Continuing                    | -             | -           | 0            |
| Vasectomy                            | New n, (% of total new users) | 4 (1.6%)      | -           | 0            |
|                                      | Continuing                    | -             | -           | 0            |
| Total                                | New                           | 2,565         | 1,615       | 1662         |
| FP clients                           | Continuing                    | 5,479         | 3,599       | 2793         |

<sup>1</sup>PPAT and SMRU
